# Supplementary material for: The effect of fluralaner treatment of small mammals on the endemic cycle of Borrelia burgdorferi in a natural environment
Source: PubMed Central journal article supplement — J Med Entomol. 2024 Aug 9;61(5):1203–13. doi: 10.1093/jme/tjae091 (PMC11386212; doi:10.1093/jme/tjae091), 2024-08-09
Supplement: tjae091_suppl_supplementary_materials.pdf [file tjae091_suppl_supplementary_materials.pdf]

## Extraction of DNA and amplification of the rRNA-23S and OspA genes

First, DNA was extracted from nymphs and mice biopsies using the DNeasy Blood & Tissue kit (Qiagen, Hilden, Germany) following the manufacturer's protocol. The extracted DNA was then quantified using the Cytation 5 machine (Biotek, Winooski, VT, USA). The DNA was stored at -20 °C until PCR testing.

To test for the presence of *Borrelia* spp., we first screened the samples using primers that amplify the *rRNA-23S* gene (Courtney et al. 2004). Positive samples were subsequently tested for the presence of *B. burgdorferi* using primers that amplify the *OspA* gene (Tokarz et al. 2017). The final PCR solutions contained between 10-30 ng/μL of extracted genomic DNA and 10 nM of *23S-rRNA* or *OspA* primers (Integrated DNA Technologies, Coralville, IA, USA). For *Borrelia* spp. screening, PCR was performed using 10X Taq polymerase (Bio Basic, Markham, ON, Canada) in a Proflex PCR System (Life Technologies, Carlsbad, CA, USA). The amplification conditions are described in Table P1. PCR products were electrophoretically resolved in 1 X TE, 2% agarose gels stained with 6X orange DNA loading dye (Thermo scientific, Vilnius, Lithuania). Images were captured using a ChemiDoc MP Imaging System (Bio-Rad Laboratories, Hercules, CA, USA) and positive samples were identified by the presence of a 75 bp band.

**Table P1. Amplification conditions of the 23S-rRNA PCR reaction**

| Phase                 |              | Temperature (°C) | Time | Number of cycles |
|-----------------------|--------------|------------------|------|------------------|
| Polymerase activation |              | 95               | 2 m  | 1                |
| Amplification         | Denaturation | 95               | 20 s |                  |
|                       | Annealing    | 60               | 40 s | 35               |
|                       | Extension    | 72               | 8 s  |                  |

m = minutes, s = seconds.

18 To identify *B. burgdorferi*, qPCR was performed using 1X iTaq Universal SYBR Green Supermix (Bio-  
 19 Rad Laboratories) and *OspA* primers on the CFX Opus 96 real-time PCR system (Bio-Rad Laboratories).  
 20 The reaction conditions are listed in Table P2. Fluorescence was measured after each amplification cycle.  
 21 At the end of the amplification phase of the *OspA* assay, a melting curve was set up from 56 °C to 95 °C  
 22 with a 0.5 °C increase every 5s to confirm that the amplified DNA was the target gene. A test was  
 23 confirmed positive when the quantification threshold was reached within 30 amplification cycles and a  
 24 melting peak was detected at 76 °C. Samples were tested with negative control (sterile water) and positive  
 25 control (1 pg of a gene fragment from gBlocks™; Integrated DNA Technologies).

26 **Table P2. Amplification conditions of the *OspA* qPCR reaction**

| Phase                 |              | Temperature (°C) | Time | Number of cycles |
|-----------------------|--------------|------------------|------|------------------|
| Polymerase activation |              | 95               | 3 m  | 1                |
| Amplification         | Denaturation | 95               | 10 s | 39               |
|                       | Annealing    | 60               | 10 s |                  |
|                       | Elongation   | 56               | 5 s  |                  |

27 m = minutes; s = seconds

28

29 **References**

30 **Courtney, J. W., L. M. Kostelnik, N. S. Zeidner, and R. F. Massung. 2004.** Multiplex real-time PCR  
 31 for detection of *Anaplasma phagocytophilum* and *Borrelia burgdorferi*. J Clin Microbiol 42: 3164-3168.  
 32 **Tokarz, R., T. Tagliafierro, D. M. Cucura, I. Rochlin, S. Sameroff, and W. I. Lipkin. 2017.**  
 33 Detection of *Anaplasma phagocytophilum*, *Babesia microti*, *Borrelia burgdorferi*, *Borrelia miyamotoi*,  
 34 and Powassan virus in ticks by a Multiplex real-time reverse transcription-PCR assay. mSphere  
 35 19;2(2):e00151-17.
