# Supplementary material for: The effect of fluralaner treatment of small mammals on the endemic cycle of Borrelia burgdorferi in a natural environment
Source: PubMed Central journal article supplement — J Med Entomol. 2024 Aug 9;61(5):1203–13. doi: 10.1093/jme/tjae091 (PMC11386212; doi:10.1093/jme/tjae091), 2024-08-09
Supplement: tjae091_suppl_supplementary_tables.pdf [file tjae091_suppl_supplementary_tables.pdf]

- 1 **Table S1.** Results of univariate test between covariates and mouse infection by *B.*  
 2 *burgdorferi*

| <b>Variables</b> | <b>Description</b> | $\chi^2$ | <b>Df</b> | <b>P-value</b> | <b>VIF CI95</b> |
|------------------|--------------------|----------|-----------|----------------|-----------------|
| Year             | 3 levels factor    | 1.54     | 2         | 0.463          | Excluded        |
| Zone             | 3 levels factor    | 9.51     | 2         | 0.009          | 2.32 - 3.41     |
| Period           | Binary             | 6.40     | 1         | 0.011          | 1.00 - 2.01     |
| Age              | Binary             | 54.74    | 1         | < 0.001        | 1.00 - 2.49     |
| Sex              | Binary             | 0.30     | 1         | 0.584          | Excluded        |
| Plots            | 11 levels factor   | 14.21    | 10        | 0.164          | Random          |

- 3 CI95 = 95% confidence interval, Df = Degree of freedom, VIF = variance inflation factor.

4

5 **Table S2.** Results of univariate test between covariates and the density of questing nymphs

| <b>Variables</b> | <b>Description</b> | $\chi^2$ | <b>Df</b> | <b>P-value</b> | <b>VIF CI95</b> |
|------------------|--------------------|----------|-----------|----------------|-----------------|
| Year             | 4-level factor     | 77.82    | 3         | < 0.001        | 8.09 - 11.05    |
| Month            | 4-level factor     | 373.00   | 3         | < 0.001        | 1.01 - 1.34     |
| Zone             | 3-level factor     | 37.60    | 2         | < 0.001        | 2.50 - 3.28     |
| Cohort           | Binary             | 13.13    | 1         | < 0.001        | 1.50 - 1.89     |
| Plot             | 11-level factor    | 37.00    | 10        | < 0.001        | Random          |

6 CI95 = 95% confidence interval, Df = Degree of freedom, VIF = variance inflation factor.

7

8 **Table S3.** Results of univariate test between covariates and the prevalence of *B.*  
 9 *burgdorferi* infected nymphs

| <b>Variables</b> | <b>Description</b> | $\chi^2$ | <b>Df</b> | <b>P-value</b> | <b>VIF CI95</b> |
|------------------|--------------------|----------|-----------|----------------|-----------------|
| Year             | 4-level factor     | 30.81    | 3         | < 0.001        | 5.66 - 5.54     |
| Month            | 4-level factor     | 11.53    | 3         | 0.009          | 1.09 - 1.22     |
| Zone             | 3-level factor     | 1.88     | 2         | 0.390          | Excluded        |
| Plot             | 11-level factor    | 37.00    | 10        | 0.129          | Random          |

10 CI95 = 95% confidence interval, Df = Degree of freedom, VIF = variance inflation factor.
